# Supplementary material for: A Structured Model of Video Reproduces Primary Visual Cortical Organisation
Source: PubMed Central journal article supplement (PMC2726939; doi:10.1371/journal.pcbi.1000495), 2009-09-04
Supplement: pcbi.1000495.s003.pdf [file pcbi.1000495.s003.pdf]

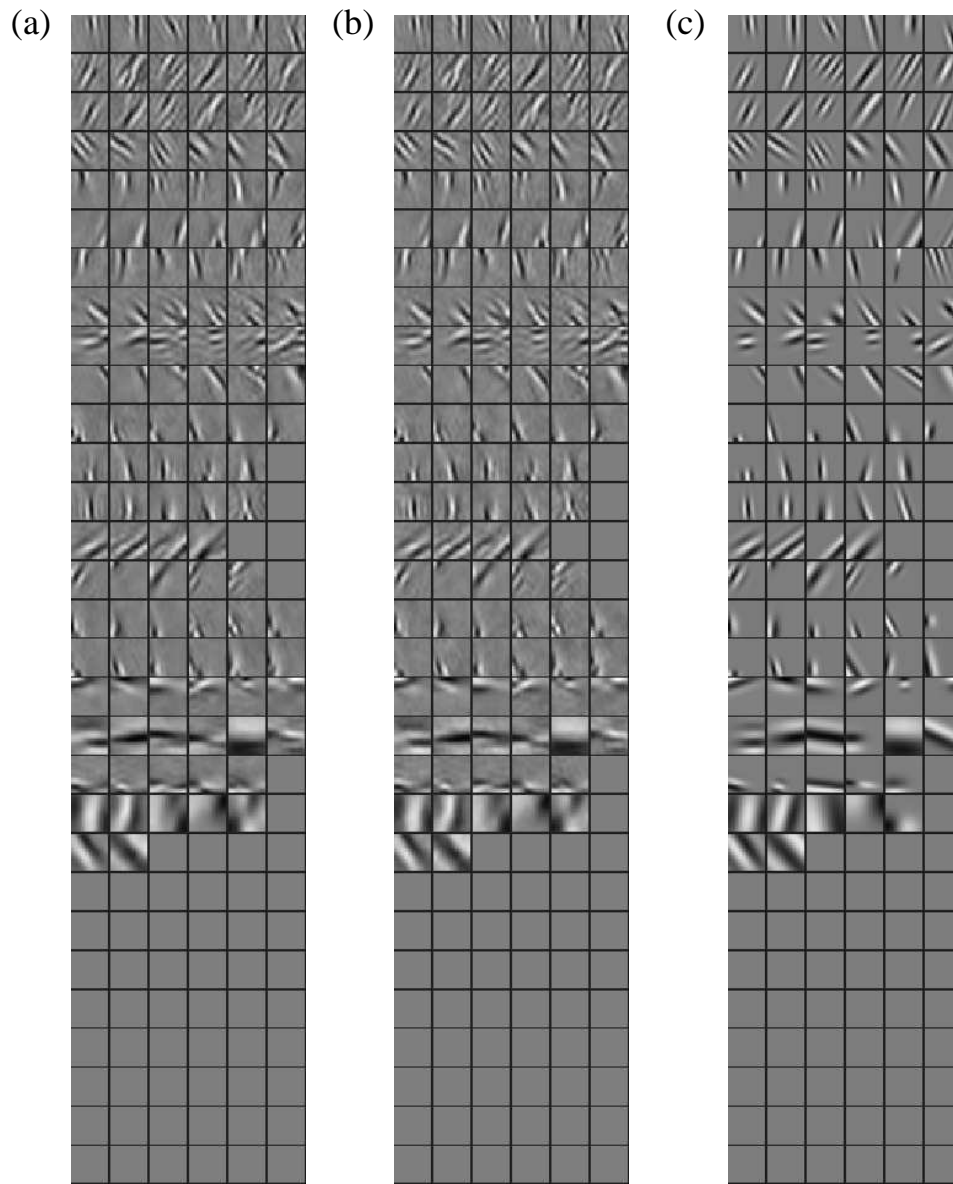

(a) Basis vectors learned from the time-shuffled Catcam data, as in Fig. 7A of the paper. (b) Linear filters fitted to the attribute variables using reverse correlation on colored noise. (c) Gabor fit of the filters.
